# Supplementary material for: Dynamic loading enhances chondrogenesis of human chondrocytes within a biodegradable resilient hydrogel
Source: Royal Society of Chemistry journal article supplement (doi:10.1039/d1bm00413a), 2021-01-01
Supplement: d1bm00413a3.pdf [file d1bm00413a3.pdf]

## Supplementary materials

### **Dynamic Loading Enhances Chondrogenesis of Human Chondrocytes within a biodegradable Resilient Hydrogel**

Mingsheng Xie<sup>1,3</sup>, Madalyn Fritch<sup>1</sup>, Yuchen He<sup>1</sup>, Huikang Fu<sup>2</sup>, Yi Hong<sup>2\*</sup>, and Hang Lin<sup>1,4,5\*</sup>

<sup>1</sup> Department of Orthopaedic Surgery, University of Pittsburgh School of Medicine, Pittsburgh, PA, 15217, USA

<sup>2</sup> Department of Bioengineering, University of Texas at Arlington, Arlington, TX, 76019, USA

<sup>3</sup> Department of Orthopaedic, Xiangya Hospital, Central South University, Changsha, Hunan Province, 410008, China

<sup>4</sup> Department of Bioengineering, University of Pittsburgh Swanson School of Engineering, Pittsburgh, PA, 15219, USA

<sup>5</sup> McGowan Institute for Regenerative Medicine, University of Pittsburgh School of Medicine, Pittsburgh, PA, 15219, USA

\*Correspondence:

Hang Lin, PhD

Department of Orthopaedic Surgery, University of Pittsburgh School of Medicine

450 Technology Drive, Room 217, Pittsburgh, PA, 15219, USA

Phone: 412-624-5503; Fax: 412-624-5544

Email: hal46@pitt.edu

Yi Hong, PhD

Department of Bioengineering, University of Texas at Arlington, Arlington, TX, 76019, USA

Phone: 817-272-0562; Fax: 817-272-2251

Email: yihong@uta.edu

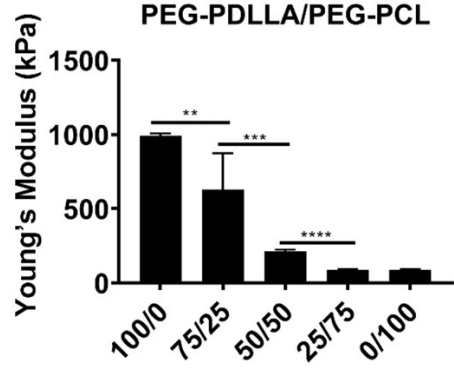

**Fig. S1** Young's moduli of scaffolds made from PEG-PDLLA-DA/PEG-PCL-DA mixture with different ratios. 100/0 and 0/100 represented 100% PEG-PDLLA and 100% PEG-PCL hydrogels, respectively. N=4; \*\*,  $p < 0.01$ ; \*\*\*,  $p < 0.001$ ; \*\*\*\*,  $p < 0.0001$ .

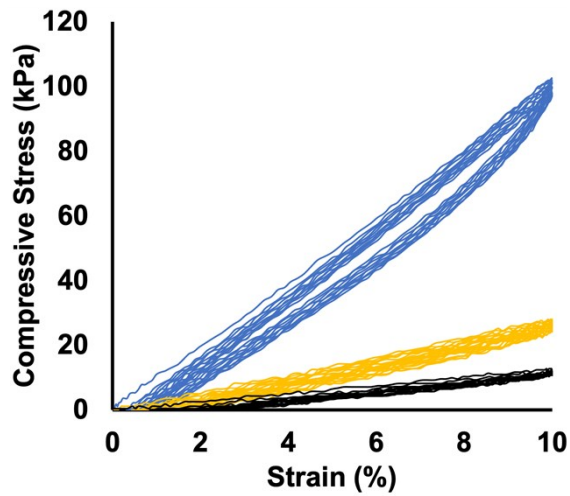

**Fig. S2** Cyclic test for three hydrogels: PEG-PDLLA/PEG-PCL (50/50, Yellow lines), PEG-PDLLA (Blue lines), PEG-PCL (Black lines). The test was conducted for 10 cycles with a maximal strain of 10%.

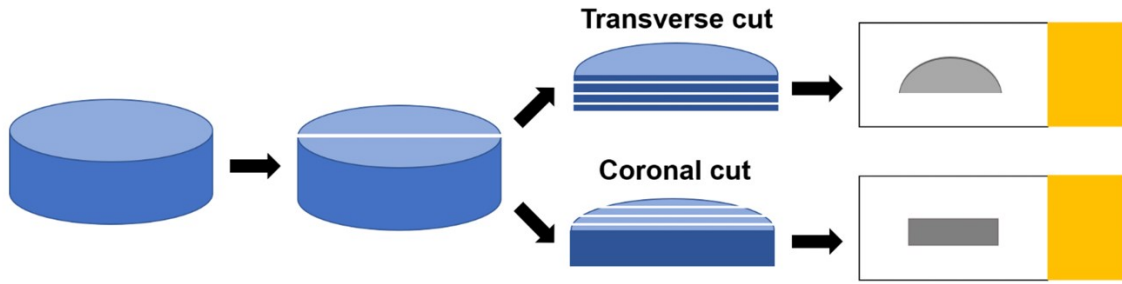

**Fig. S3** Two methods to section the samples.

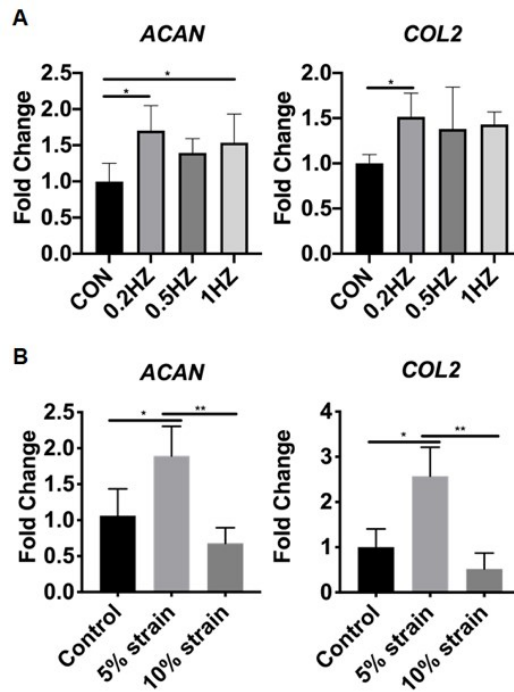

**Fig. S4** In this study, we first used the same strain (5%) and compared the influence of different frequencies on chondrogenesis (A), and then used the same frequency (0.2Hz) and examined the influence of different strains (B). Expression levels of *ACAN* and *COL2* in conditions were examined. \*,  $p < 0.05$ ; \*\*,  $p < 0.01$ .

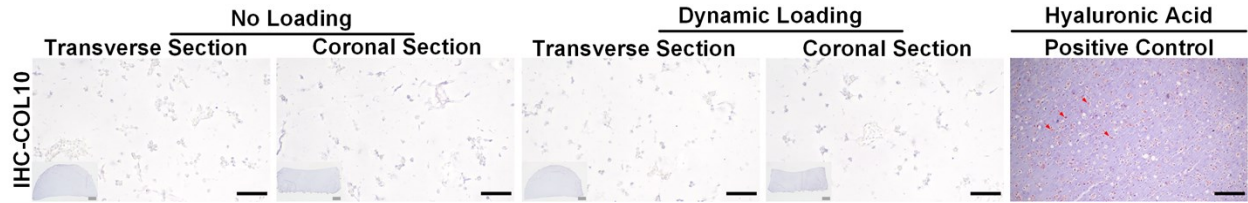

**Fig. S5** COL10 IHC. Grey bar= 500  $\mu\text{m}$ , black bar= 100  $\mu\text{m}$ . Chondroinduced human mesenchymal stem cells in hyaluronic acid scaffold were served as the positive control. The positive staining was inducted by red arrows.

**Table S1. Gene primer sequences used in qRT-PCR**

| Gene                  | Primer Sequence (5' → 3') |
|-----------------------|---------------------------|
| <i>COL2</i> Forward   | GGATGGCTGCACGAAACATACCGG  |
| <i>COL2</i> Reverse   | CAAGAAGCAGACCGGCCCTATG    |
| <i>ACAN</i> Forward   | ACTCTGGGTTTTTCGTGACTCT    |
| <i>ACAN</i> Reverse   | ACACTCAGCGAGTTGTCATGG     |
| <i>SOX9</i> Forward   | GGCGGAGGAAGTCGGTGAAGAA    |
| <i>SOX9</i> Reverse   | GCTCATGCCGGAGGAGGAGTGT    |
| <i>COL10</i> Forward  | CCCTCTTGTTAGTGCCAACC      |
| <i>COL10</i> Reverse  | AGATTCCAGTCCTTGGGTCA      |
| <i>RPL13a</i> Forward | CATAGGAAGCTGGGAGCAAG      |
| <i>RPL13a</i> Reverse | GCCCTCCAATCAGTCTTCTG      |
